# Supplementary material
Source: PubMed Central journal article supplement (PMC5504490)
Supplement: pr7b00068_si_001.pdf [file pr7b00068_si_001.pdf]

## Supporting Information

In culture cross-linking of bacterial cells reveals large scale dynamic protein-protein interactions at the peptide level

Luitzen de Jong<sup>1\*</sup>, Edward A. de Koning<sup>1</sup>, Winfried Roseboom<sup>1</sup>, Hansuk Buncherd<sup>3</sup>, Martin J. Wanner<sup>2</sup>, Irena Dapic<sup>2</sup>, Petra J. Jansen<sup>2</sup>, Jan H. van Maarseveen<sup>2</sup>, Garry L. Corthals<sup>2</sup>, Peter J. Lewis<sup>4\*</sup>, Leendert W. Hamoen<sup>1\*</sup> and Chris G. de Koster<sup>1\*</sup>

<sup>1</sup>Swammerdam Institute for Life Sciences, and <sup>2</sup>Van't Hoff Institute of Molecular Science, University of Amsterdam, 1098 XH Amsterdam, The Netherlands. <sup>3</sup>Faculty of Medical Technology, Prince of Songkla University, Hatyai, Songkhla 90110, Thailand. <sup>4</sup>School of Environmental and Life Sciences, University of Newcastle, Callaghan, NSW 2308, Australia.

**Table S1.** Proteins identified in SCX fractions 1-12 (separate xlsx file).

**Table S2.** Inter-protein cross-linked peptides (separate xlsx file).

**Table S3.** Intra-protein cross-linked peptides (cross-links with different sequences from the same protein) (separate xlsx file)

**Table S4.** Effect of variations of assignment criteria on the number of identified cross-linked peptides and the false discovery rate. Page S-3

**Table S5.** Distance measurements for HADDOCK output data on the combined *in vitro* and *in vivo* cross-linking data for the interaction of  $\delta$  with the  $\beta'$  subunit of RNAP. Page S-4

**Figure S1.** Structures of cross-linkers used in this study. Page S-5

**Figure S2.** Growth arrest of *Bacillus subtilis* after addition of various concentrations of BAMG. Page S-6

**Figure S3.** Extracted proteins after *in vivo* cross-linking with different concentrations BAMG of exponentially growing *B. subtilis* can be digested efficiently. Page S-7

**Figure S4.** Growth curve of E coli in MOPS medium supplemented with 0.16% N-acetylglucosamine and 0.1 mM NH<sub>4</sub>Cl. Page S-8

**Figure S5.** Coomassie Brilliant Blue stained SDS-PAGE of extracted proteins from exponentially growing *E. coli* before and after addition of 2mM of the cross-linker BAMG directly in the growth medium. Page S-9

**Figure S6.** Distribution of 135 cross-link distances derived from 31 crystal structures comprising 43 different proteins with non-overlapping cross-linked peptide sequences from the same protein sequence, denoted intra-protein cross-links. Page S-10

**Table S4**

Supplementary Table 4. Effect of variations of assignment criteria on the number of identified cross-linked peptides (spectral counts) and the false discovery rate (FDR)

| XL type                                        | criteria  |                                                                 |                                                              | spectral counts |       | FDR    |       |
|------------------------------------------------|-----------|-----------------------------------------------------------------|--------------------------------------------------------------|-----------------|-------|--------|-------|
|                                                | score     | minimum nr of assigned y ions to peptides $\leq$ 10 amino acids | minimum nr of assigned y ions to peptides $>$ 10 amino acids | unique          | total | unique | total |
| <i>intra protein</i>                           | $\geq 40$ | 3                                                               | 4                                                            | 295             | 1273  | 0%     | 0%    |
| <i>decoy intra protein</i>                     | $\geq 40$ | 3                                                               | 4                                                            | 0               | 0     |        |       |
| <i>intraprotein</i>                            | $\geq 40$ | 2                                                               | 3                                                            | 343             | 1614  | 0%     | 0%    |
| <i>decoy intra protein</i>                     | $\geq 40$ | 2                                                               | 3                                                            | 0               | 0     |        |       |
| <i>intraprotein</i>                            | $\geq 40$ | 1                                                               | 1                                                            | 369             | 1920  | 0%     | 0%    |
| <i>decoy intra protein</i>                     | $\geq 40$ | 1                                                               | 1                                                            | 0               | 0     |        |       |
| <i>intra protein</i>                           | $\geq 25$ | 1                                                               | 1                                                            | 370             | 1990  | 0%     | 0%    |
| <i>decoy intra protein</i>                     | $\geq 25$ | 1                                                               | 1                                                            | 0               | 0     |        |       |
| <i>interprotein (different peptides)</i>       | $\geq 40$ | 3                                                               | 4                                                            | 58              | 231   | 0%     | 0%    |
| <i>decoy interprotein</i>                      | $\geq 40$ | 3                                                               | 4                                                            | 0               | 0     |        |       |
| <i>interprotein</i>                            | $\geq 25$ | 3                                                               | 4                                                            | 59              | 236   | 2%     | 0.4%  |
| <i>decoy interprotein</i>                      | $\geq 25$ | 3                                                               | 4                                                            | 1               | 1     |        |       |
| <i>interprotein</i>                            | $\geq 40$ | 2                                                               | 3                                                            | 80              | 285   | 14%    | 4%    |
| <i>decoy interprotein</i>                      | $\geq 40$ | 2                                                               | 3                                                            | 13              | 13    |        |       |
| <i>interprotein same peptides (homodimers)</i> | $\geq 40$ | 3                                                               | 4                                                            | 24              | 67    | 0%     | 0%    |
| <i>decoy homodimers</i>                        | $\geq 40$ | 3                                                               | 4                                                            | 0               | 0     |        |       |
| <i>homodimers</i>                              | $\geq 40$ | 2                                                               | 3                                                            | 24              | 68    | 0%     | 0%    |
| <i>decoy homodimers</i>                        | $\geq 40$ | 2                                                               | 3                                                            | 0               | 0     |        |       |
| <i>homodimers</i>                              | $\geq 25$ | 3                                                               | 4                                                            | 25              | 76    | 0%     | 0%    |
| <i>decoy homodimers</i>                        | $\geq 25$ | 3                                                               | 4                                                            | 0               | 0     |        |       |

**Table S5.** Distance measurements for HADDOCK output data on the combined *in vitro* and *in vivo* cross-linking data for the interaction of  $\delta$  with the  $\beta'$  subunit of RNAP.

| Cluster | Cluster model | Distance Å (C $\alpha$ -C $\alpha$ ) |       |       | Total | Rank |
|---------|---------------|--------------------------------------|-------|-------|-------|------|
|         |               | K208                                 | K1104 | K1152 |       |      |
| 1       | 1             | 15.8                                 | 34.4  | 25.1  | 75.3  | 3    |
|         | 2             |                                      |       |       | 0     |      |
|         | 3             |                                      |       |       | 0     |      |
|         | 4             |                                      |       |       | 0     |      |
| 2       | 1             | 20.5                                 | 35.5  | 28.7  | 84.7  | 10   |
|         | 2             |                                      |       |       | 0     |      |
|         | 3             |                                      |       |       | 0     |      |
|         | 4             |                                      |       |       | 0     |      |
| 3       | 1             | 17.2                                 | 34.5  | 24.5  | 76.2  | 4    |
|         | 2             |                                      |       |       | 0     |      |
|         | 3             |                                      |       |       | 0     |      |
|         | 4             |                                      |       |       | 0     |      |
| 4       | 1             | 10.4                                 | 29.9  | 24.3  | 64.6  | 1    |
|         | 2             | 10.2                                 | 29.3  | 23.9  | 63.4  |      |
|         | 3             | 10.8                                 | 29.7  | 23.8  | 64.3  |      |
|         | 4             | 10.6                                 | 30.1  | 24.2  | 64.9  |      |
| 5       | 1             | 17                                   | 34.5  | 25.4  | 76.9  | 6    |
|         | 2             |                                      |       |       | 0     |      |
|         | 3             |                                      |       |       | 0     |      |
|         | 4             |                                      |       |       | 0     |      |
| 6       | 1             | 11.4                                 | 34.2  | 24.3  | 69.9  | 2    |
|         | 2             | 11.4                                 | 34.5  | 24.1  | 70    |      |
|         | 3             | 10.6                                 | 33.7  | 23.6  | 67.9  |      |
|         | 4             | 11                                   | 34.3  | 24    | 69.3  |      |
| 7       | 1             | 19.2                                 | 34.1  | 27.9  | 81.2  | 7    |
|         | 2             |                                      |       |       | 0     |      |
|         | 3             |                                      |       |       | 0     |      |
|         | 4             |                                      |       |       | 0     |      |
| 9       | 1             | 20.4                                 | 29    | 32    | 81.4  | 8    |
|         | 2             |                                      |       |       | 0     |      |
|         | 3             |                                      |       |       | 0     |      |
|         | 4             |                                      |       |       | 0     |      |
| 10      | 1             | 19.3                                 | 35.9  | 27.7  | 82.9  | 9    |
|         | 2             |                                      |       |       | 0     |      |
|         | 3             |                                      |       |       | 0     |      |
|         | 4             |                                      |       |       | 0     |      |
| 13      | 1             | 16.8                                 | 33.8  | 26    | 76.6  | 5    |
|         | 2             |                                      |       |       | 0     |      |
|         | 3             |                                      |       |       | 0     |      |
|         | 4             |                                      |       |       | 0     |      |

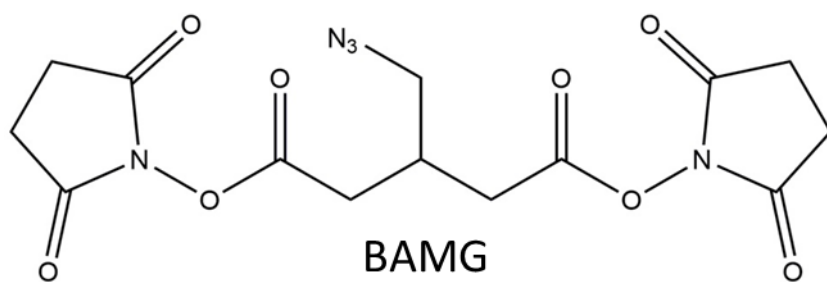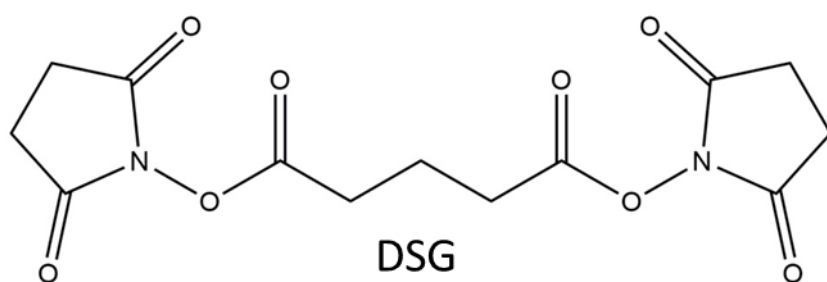

**Figure S1.** Structures of cross-linkers used in this study. BAMG, bis(succinimidyl)-3-azidomethyl-glutarate; DSG, disuccinimidyl-glutarate.

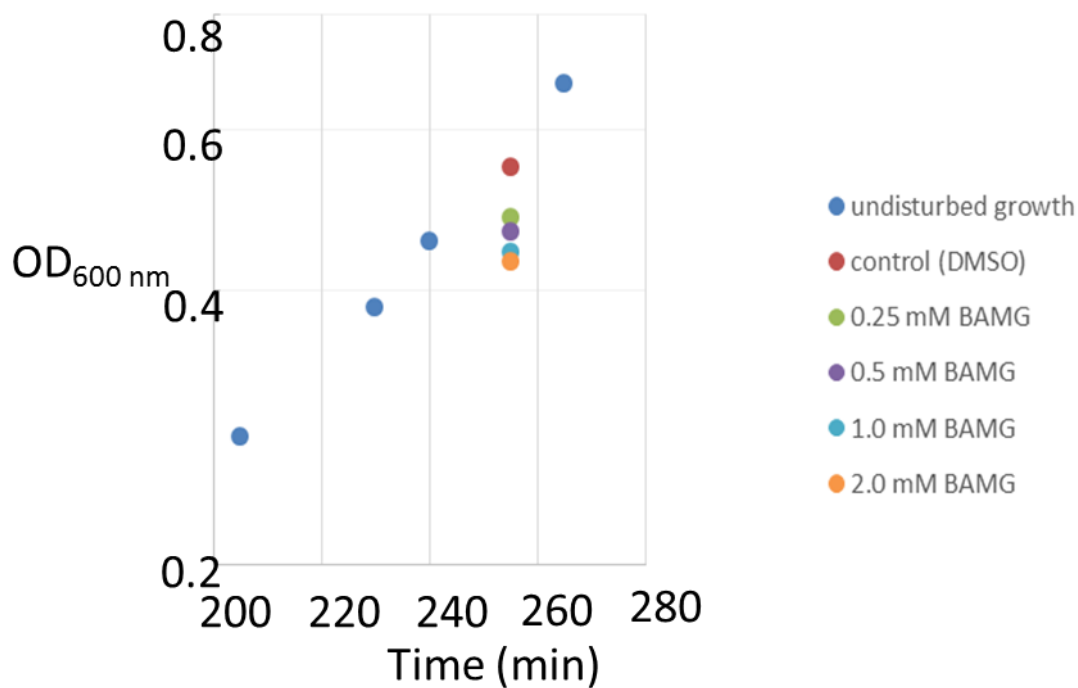

**Figure S2.** Growth arrest of *Bacillus subtilis* after addition of various concentrations of BAMG. Six culture flasks with 10 ml pre-warmed minimal medium containing 1.2 mM glutamine were inoculated with 0.4 ml from an exponentially growing pre-culture to obtain a final  $OD_{600\text{ nm}} = 0.012$ . Growth was followed in one culture flask. At  $t = 240$  min, 50  $\mu\text{l}$  of a DMSO solution containing the required amount of BAMG was rapidly added to the each of the five other cultures. After 5 min the reaction was quenched by addition of 0.5 ml 1 M Tris-HCL pH 8.0 and 10 min later the  $OD_{600\text{ nm}}$  was measured. Values were corrected for volume changes by the additions of cross-linker and quenching solutions. Extracts of cross-linked samples were subjected to SDS-PAGE analysis before and after digestion with trypsin (See Figure S3).

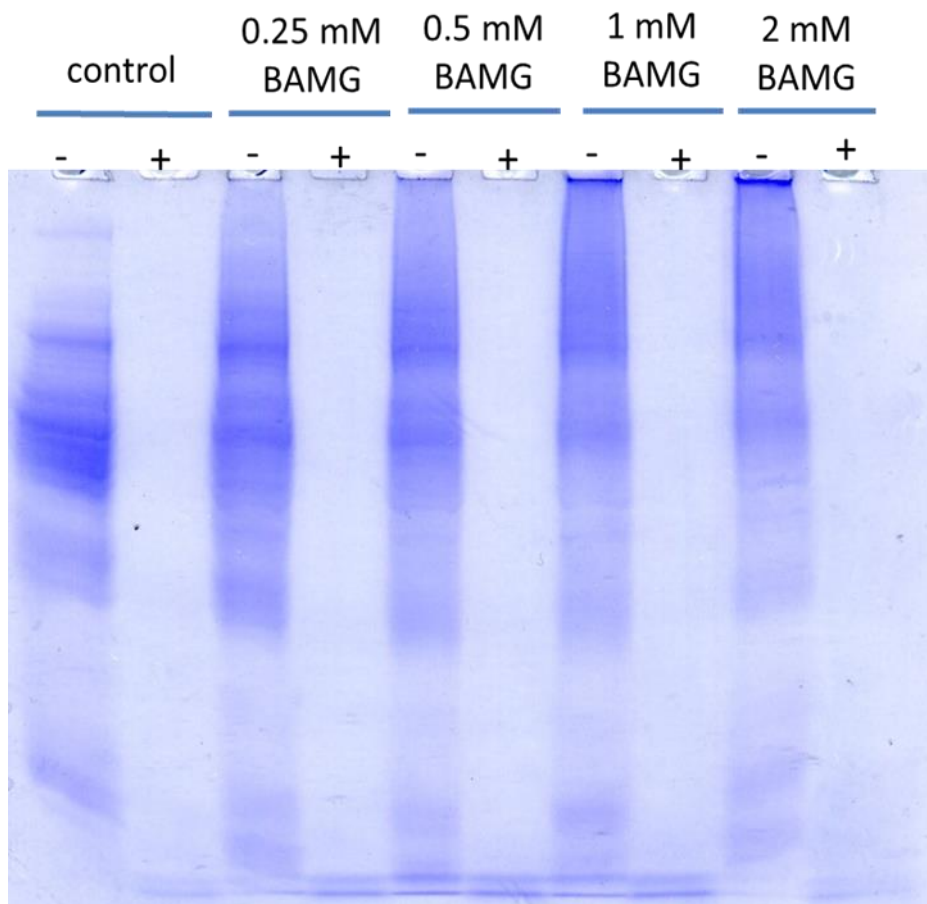

**Figure S3.** Extracted proteins after in vivo cross-linking with different concentrations BAMG of exponentially growing *B. subtilis* can be digested efficiently. Proteins before and after digestion were concentrated by centrifugation on a 10 kDa cut-off filter before SDS-PAGE analysis on 12% gels. -, before digestion with trypsin; +, after digestion with trypsin. Gels were stained with Coomassie Brilliant Blue.

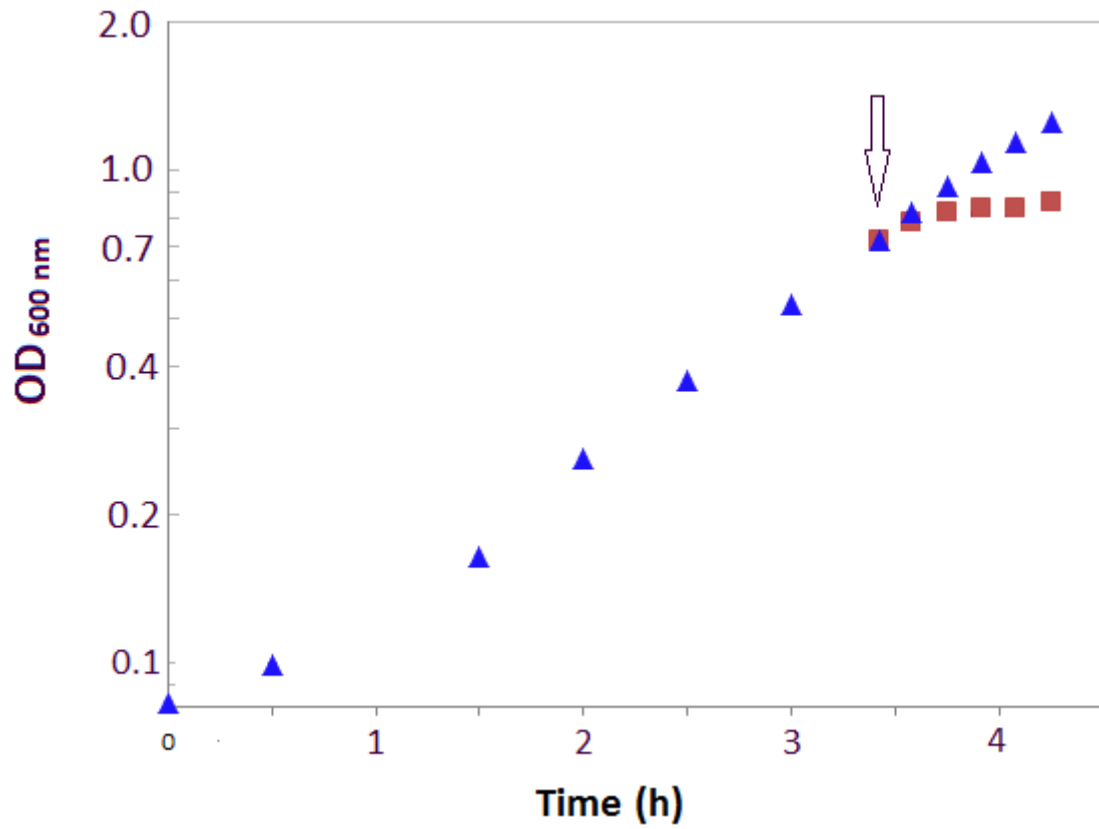

**Figure S4.** Growth curve of E coli in MOPS medium supplemented with 0.16% N-acetylglucosamine and 0.1 mM  $\text{NH}_4\text{Cl}$ . Blue triangles, undisturbed growth; arrow, addition of 2 mM BAMG or DMSO (control). Brown squares, growth after addition of BAMG.



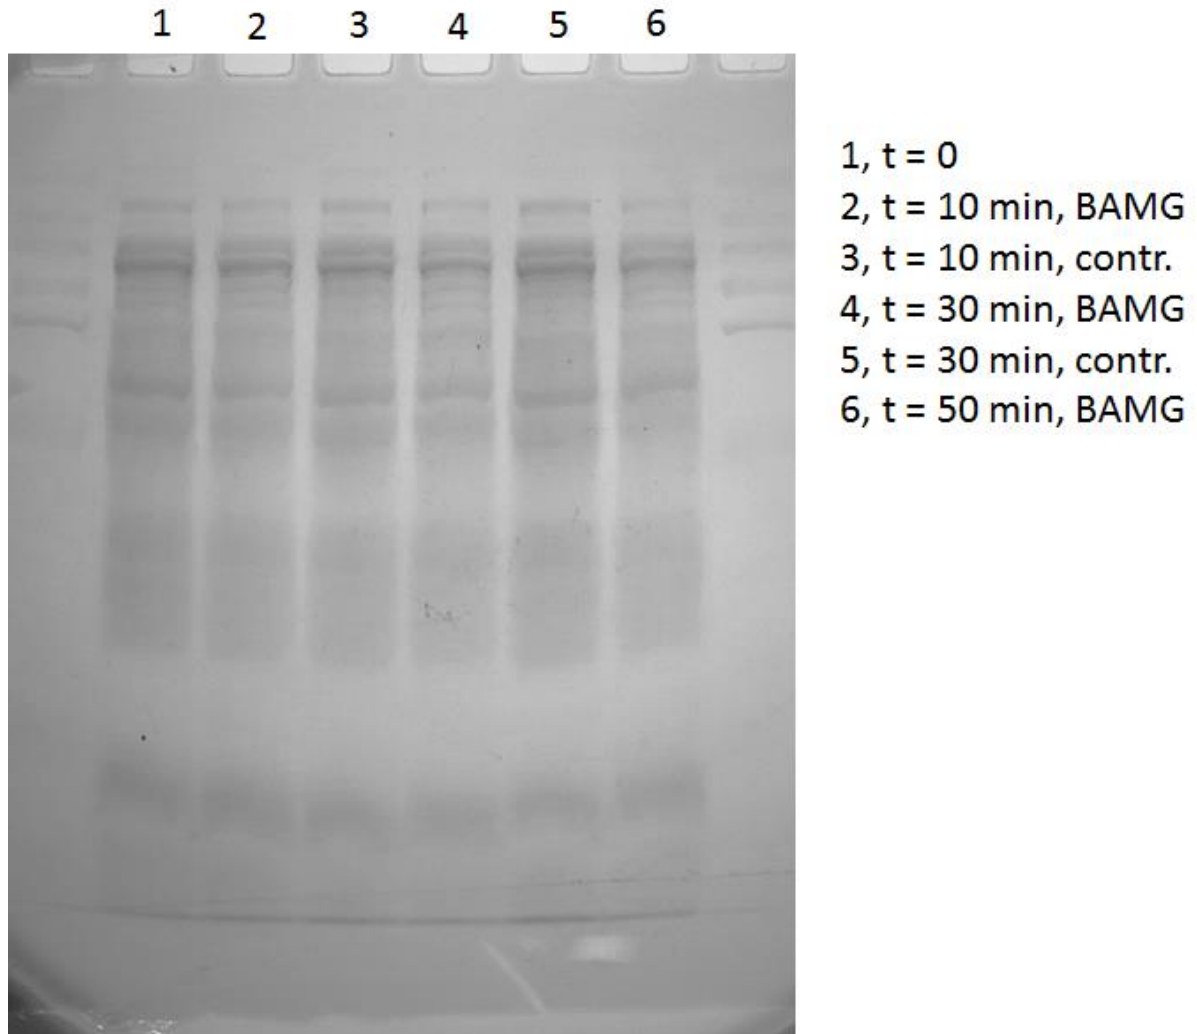

**Figure S5.** Coomassie Brilliant Blue stained SDS-PAGE of extracted proteins from exponentially growing *E. coli* before and after addition of 2mM of the cross-linker BAMG directly in the growth medium. The similarity of the protein band patterns in the different lanes indicates that no substantial cross-linking had occurred, in contrast with in vivo cross-linking of exponentially growing *B. subtilis*.

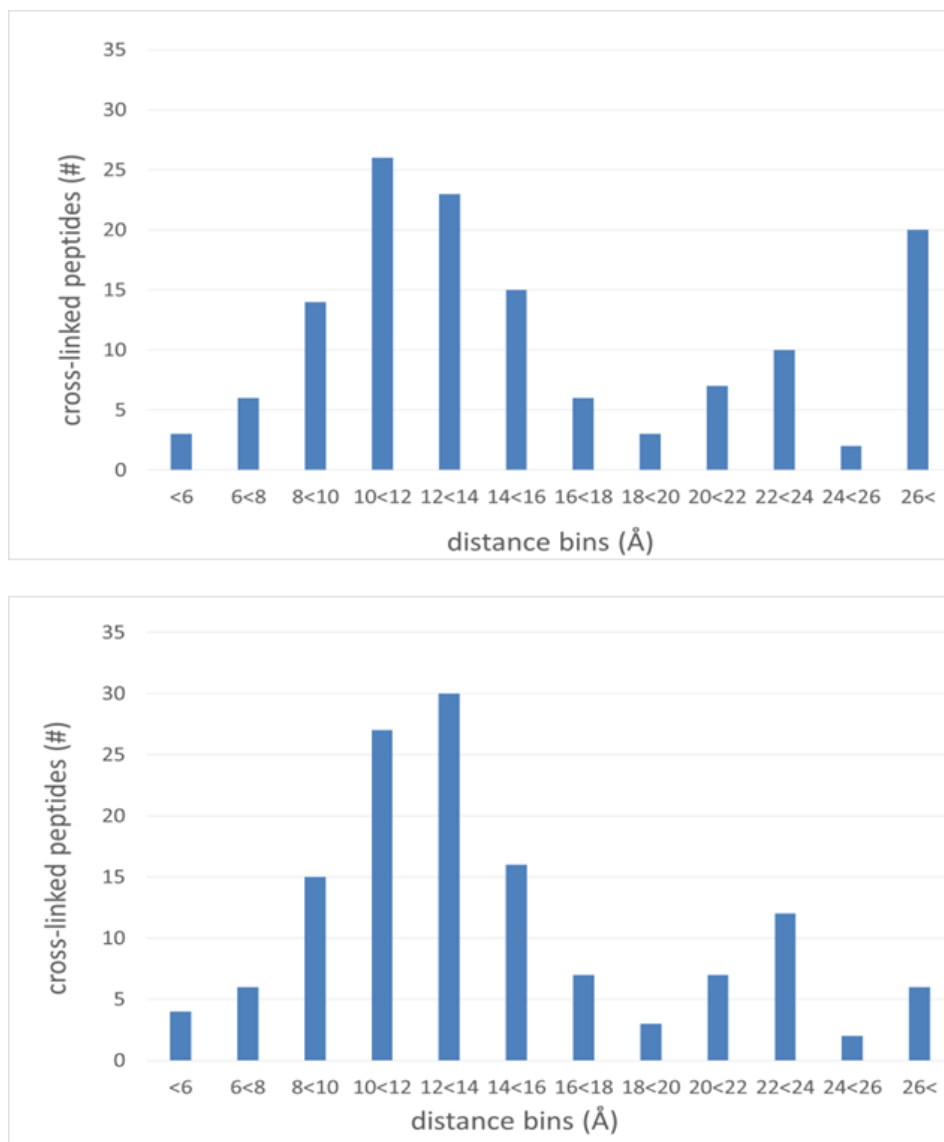

**Figure S6.** Distribution of 135 cross-link distances derived from 31 crystal structures comprising 43 different proteins with non-overlapping cross-linked peptide sequences from the same protein sequence, denoted intra-protein cross-links. The dataset was obtained from 12 crystal structures comprising 20 *B. subtilis* proteins and 19 crystal structures from homologous proteins, selected for 23 other *B. subtilis* proteins with at least three cross-linked peptides (**Table S3**). Upper panel, distribution of distances assuming only intra-protein cross-linked peptides. The majority (85,2%,) of the cross-links is within the 25.7 Å limit of BAMG. Lower panel, distribution of distances upon mapping cross-links exceeding the 25.7 Å between identical proteins in the crystal structures (inter-protein cross-links). This was the case with 14 cross-links, raising the percentage of species with distances < 25.7 Å to 95.6%.
